# Supplementary material
Source: PubMed Central journal article supplement (PMC8803482)

**Effects of dietary patterns on biomarkers of inflammation and immune responses: A systematic review and meta-analysis of randomized controlled trials**

Koelman, L et al.

**Online Supplementary Material**

**Supplemental Table 1.** Mean differences [95% CI] in biomarker concentrations from intervention trials following a Mediterranean diet, according to potential sources of heterogeneity

| Sources                                 | CRP            |                         | IL-6 |                         | IL-8 |                           | TNF- $\alpha$ |                         | IL-1 $\beta$ |                         | E-selectin |                         | IFN- $\gamma$ |                         |
|-----------------------------------------|----------------|-------------------------|------|-------------------------|------|---------------------------|---------------|-------------------------|--------------|-------------------------|------------|-------------------------|---------------|-------------------------|
|                                         | n <sup>a</sup> | (mg/L)                  | n    | (pg/mL)                 | n    | (pg/mL)                   | n             | (pg/mL)                 | n            | (pg/mL)                 | n          | (ng/mL)                 | n             | (pg/mL)                 |
| <b>Age</b>                              |                |                         |      |                         |      |                           |               |                         |              |                         |            |                         |               |                         |
| < 60 years                              | 5              | -1.52<br>[-3.29, 0.24]  | 3    | -1.69<br>[-4.74, 1.35]  | 2    | -6.38<br>[-23.82, -11.05] | 1             | -3.53<br>[-4.14, -2.92] | 1            | -0.52<br>[-0.75, -0.29] | 2          | -4.05<br>[-9.22, 1.11]  | 1             | -1.53<br>[-1.79, -1.27] |
| $\geq$ 60 years                         | 6              | -0.63<br>[-1.75, 0.49]  | 5    | -0.83<br>[-0.85, -0.81] | 3    | -0.77<br>[-2.34, 0.80]    | 3             | -0.97<br>[-1.72, -0.22] | 2            | -0.18<br>[-0.66, 0.30]  | 1          | 0.67<br>[-1.01, 2.35]   | 2             | -4.01<br>[-13.37, 5.35] |
| <i>P</i> -group difference <sup>b</sup> |                | 0.40                    |      | 0.58                    |      | 0.53                      |               | <0.01                   |              | 0.21                    |            | 0.09                    |               | 0.60                    |
| <b>Sex</b>                              |                |                         |      |                         |      |                           |               |                         |              |                         |            |                         |               |                         |
| Female (< 50%)                          | 4              | -1.39<br>[-2.62, -0.17] | 3    | -0.51<br>[-1.05, 0.02]  | 1    | -0.02<br>[-0.16, -0.12]   | 0             |                         | 0            |                         | 1          | -0.80<br>[-5.99, 4.39]  | 3             |                         |
| Female ( $\geq$ 50%)                    | 6              | -0.10<br>[-0.13, -0.07] | 5    | -1.43<br>[-3.41, 0.55]  | 4    | -1.99<br>[-2.91, -1.07]   | 4             |                         | 3            |                         | 2          | -2.74<br>[-9.46, 3.98]  | 0             |                         |
| <i>P</i> -group difference              |                | 0.04                    |      | 0.38                    |      | <0.01                     |               | -                       |              | -                       |            | 0.65                    |               | -                       |
| <b>Geographic region</b>                |                |                         |      |                         |      |                           |               |                         |              |                         |            |                         |               |                         |
| Americas                                | 2              | -0.57<br>[-2.75, 1.61]  | 2    | -2.51<br>[-5.94, 0.93]  | 2    | -6.38<br>[-23.82, 11.05]  | 1             | -3.53<br>[-4.14, -2.92] | 1            | -0.52<br>[-0.75, -0.29] | 1          | -6.19<br>[-8.14, -4.24] | 1             | -1.53<br>[-1.79, -1.27] |
| Asia                                    | 0              |                         | 0    |                         | 0    |                           | 0             |                         | 0            |                         | 0          |                         | 0             |                         |
| Europe                                  | 5              | -1.85<br>[-3.02, -0.67] | 4    | -0.38<br>[-0.70, -0.07] | 2    | -3.64<br>[-18.68, 11.40]  | 3             | -0.97<br>[-1.72, -0.22] | 2            | -0.18<br>[-0.66, 0.30]  | 2          | 0.53<br>[-1.07, 2.13]   | 3             | -4.01<br>[-13.37, 5.35] |
| Oceania                                 | 4              | -0.09<br>[-0.55, 0.37]  | 2    | -0.83<br>[-0.85, -0.81] | 1    | -0.02<br>[-0.16, -0.12]   | 0             |                         | 0            |                         | 0          |                         | 0             |                         |

|                            |   |                         |   |                         |   |                          |   |                         |   |                         |   |                         |   |                          |
|----------------------------|---|-------------------------|---|-------------------------|---|--------------------------|---|-------------------------|---|-------------------------|---|-------------------------|---|--------------------------|
| <i>P</i> -group difference |   | 0.02                    |   | 0.01                    |   | 0.69                     |   | <0.01                   |   | 0.21                    |   | <0.01                   |   | 0.60                     |
| <b>Health status</b>       |   |                         |   |                         |   |                          |   |                         |   |                         |   |                         |   |                          |
| CVD                        | 4 | -0.75<br>[-2.90, 1.40]  | 1 | -0.45<br>[-1.30, 0.40]  | 0 |                          | 0 | 0                       | 0 | 0                       | 0 | 0                       | 0 | 0                        |
| MetS                       | 5 | -1.40<br>[-2.90, 0.10]  | 5 | -1.19<br>[-2.96, 0.57]  | 3 | -1.98<br>[-2.87, -1.09]  | 3 | -2.10<br>[-3.92, -0.28] | 2 | -0.41<br>[-0.77, -0.04] | 3 | 3                       | 3 | 3                        |
| Healthy                    | 1 | -0.40<br>[-1.13, 0.33]  | 0 |                         | 0 |                          | 0 | 0                       | 0 | 0                       | 0 | 0                       | 0 | 0                        |
| Diabetes                   | 1 | -0.78<br>[-1.45, -0.11] | 0 |                         | 0 |                          | 0 | 0                       | 0 | 0                       | 0 | 0                       | 0 | 0                        |
| Other                      | 0 |                         | 2 | -0.83<br>[-0.85, -0.81] | 2 | -3.50<br>[-23.23, 16.23] | 1 | -0.68<br>[-1.70, 0.34]  | 1 | -0.32<br>[-1.16, 0.52]  | 0 | 0                       | 0 | 0                        |
| <i>P</i> -group difference |   | 0.67                    |   | 0.63                    |   | 0.88                     |   | 0.18                    |   | 0.85                    |   | -                       |   | -                        |
| <b>Obesity</b>             |   |                         |   |                         |   |                          |   |                         |   |                         |   |                         |   |                          |
| < 30 kg/m <sup>2</sup>     | 4 | -1.1<br>[-2.39, 0.16]   | 3 | -0.83<br>[-0.85, -0.81] | 2 | -0.82<br>[-2.21, 0.58]   | 1 | -1.50<br>[-2.75, -0.25] | 1 | -0.11<br>[-0.19, -0.03] | 1 | 0.67<br>[-1.01, 2.35]   | 1 | -9.40<br>[-15.93, -2.87] |
| ≥ 30 kg/m <sup>2</sup>     | 7 | -0.95<br>[-2.40, 0.51]  | 4 | -1.33<br>[-3.81, 1.15]  | 2 | -2.34<br>[-3.33, -1.35]  | 2 | -2.31<br>[-5.13, 0.52]  | 1 | -0.52<br>[-0.75, -0.29] | 2 | -4.05<br>[-9.22, 1.11]  | 1 | -1.53<br>[-1.79, -1.27]  |
| <i>P</i> -group difference |   | 0.87                    |   | 0.69                    |   | 0.08                     |   | 0.61                    |   | <0.01                   |   | 0.09                    |   | 0.02                     |
| <b>Duration</b>            |   |                         |   |                         |   |                          |   |                         |   |                         |   |                         |   |                          |
| < 6 months                 | 7 | -0.32<br>[-0.76, 0.12]  | 5 | -1.45<br>[-2.87, -0.03] | 4 | -1.28<br>[-3.61, 1.05]   | 2 | -2.14<br>[-4.93, 0.66]  | 2 | -0.51<br>[-0.73, -0.28] | 2 | -4.05<br>[-9.22, 1.11]  | 2 | -0.66<br>[-2.37, 1.06]   |
| ≥ 6 months                 | 4 | -1.82<br>[-3.29, -0.35] | 3 | -0.54<br>[-0.93, -0.15] | 1 | -1.61<br>[-2.55, -0.67]  | 2 | -1.31<br>[-2.42, -0.20] | 1 | -0.11<br>[-0.69, 0.47]  | 1 | 0.67<br>[-1.01, 2.35]   | 1 | -9.40<br>[-15.93, -2.87] |
| <i>P</i> -group difference |   | 0.06                    |   | 0.23                    |   | 0.80                     |   | 0.59                    |   | 0.21                    |   | 0.09                    |   | 0.01                     |
| < 1 year                   | 8 | -0.29<br>[-0.68, 0.09]  | 7 | -1.14<br>[-2.23, -0.04] | 4 | -1.28<br>[-3.61, 1.05]   | 2 | -2.14<br>[-4.93, 0.66]  | 2 | -0.51<br>[-0.73, -0.28] | 2 | -4.05<br>[-9.22, 1.11]  | 2 | -0.66<br>[-2.37, 1.06]   |
| ≥ 1 year                   | 3 | -2.34<br>[-3.85, -0.83] | 1 | -0.62<br>[-1.09, -0.15] | 1 | -1.61<br>[-2.55, -0.67]  | 2 | -1.31<br>[-2.42, -0.20] | 1 | -0.11<br>[-0.69, 0.47]  | 1 | 0.67<br>[-1.01, 2.35]   | 1 | -9.40<br>[-15.93, -2.87] |
| <i>P</i> -group difference |   | <0.01                   |   | 0.39                    |   | 0.80                     |   | 0.59                    |   | 0.21                    |   | 0.09                    |   | 0.01                     |
| <b>Study design</b>        |   |                         |   |                         |   |                          |   |                         |   |                         |   |                         |   |                          |
| Crossover                  | 3 | -0.10<br>[-0.13, -0.07] | 1 | -4.20<br>[-4.73, -3.67] | 1 | -2.35<br>[-3.34, -1.36]  | 1 | -3.53<br>[-4.14, -2.92] | 1 | -0.52<br>[-0.75, -0.29] | 1 | 0.53<br>[-1.07, 2.13]   | 1 | -4.01<br>[-13.37, 5.35]  |
| Parallel                   | 8 | -1.45<br>[-2.54, -0.37] | 7 | -0.58<br>[-0.88, -0.28] | 4 | -0.82<br>[-2.45, 0.80]   | 3 | -0.97<br>[-1.72, -0.22] | 2 | -0.18<br>[-0.66, 0.30]  | 2 | -6.19<br>[-8.14, -4.24] | 2 | -1.53<br>[-1.79, -1.27]  |
| <i>P</i> -group difference |   | 0.01                    |   | <0.01                   |   | 0.12                     |   | <0.01                   |   | 0.21                    |   | <0.01                   |   | 0.60                     |

| <b>Weight loss</b>         |   |                         |   |                         |   |                          |   |                         |   |                         |   |                         |   |                         |
|----------------------------|---|-------------------------|---|-------------------------|---|--------------------------|---|-------------------------|---|-------------------------|---|-------------------------|---|-------------------------|
| In both groups             | 3 | -0.96<br>[-1.51, -0.41] | 2 | -0.14<br>[-0.58, 0.29]  | 0 | -                        | 2 | -0.61<br>[-3.00, 1.78]  | 0 |                         | 1 | -0.80<br>[-5.99, 4.39]  | 0 |                         |
| Intervention               | 2 | -2.26<br>[-5.51, 0.98]  | 4 | -0.83<br>[-0.85, -0.81] | 3 | -8.39<br>[-27.91, 11.13] | 2 | -1.01<br>[-1.80, -0.22] | 1 | -0.32<br>[-1.16, 0.52]  | 0 |                         | 1 | 0.22<br>[-0.08, 0.52]   |
| Control                    | 1 | 0.25<br>[-0.68, 1.18]   | 0 |                         | 0 | -                        | 0 |                         | 0 |                         | 0 |                         | 0 |                         |
| None                       | 4 | -0.91<br>[-2.81, 0.99]  | 1 | -4.20<br>[-4.73, -3.67] | 1 | -2.35<br>[-3.34, -1.36]  | 1 | -3.53<br>[-4.14, -2.92] | 1 | -0.52<br>[-0.75, -0.29] | 1 | -6.19<br>[-8.14, -4.24] | 1 | -1.53<br>[-1.79, -1.27] |
| <i>P</i> -group difference |   | <0.01                   |   | <0.01                   |   | <0.01                    |   | <0.01                   |   | 0.65                    |   | 0.06                    |   | <0.01                   |

<sup>a</sup>Number of studies in each subgroup; <sup>b</sup>*P*- significance of subgroup difference

Abbreviations: CRP, C-reactive protein; CVD, cardiovascular disease; MetS, metabolic syndrome

**Supplemental Table 2.** Mean difference [95% CI] in CRP concentrations from intervention trials following a DASH diet and Vegetarian/vegan diet, according to potential sources of heterogeneity

| Sources                                 | DASH           |                      | Vegetarian/vegan |                      |
|-----------------------------------------|----------------|----------------------|------------------|----------------------|
|                                         | n <sup>a</sup> | CRP<br>(mg/L)        | n                | IL-6<br>(mg/L)       |
| <b>Age</b>                              |                |                      |                  |                      |
| < 60 years                              | 4              |                      | 2                | -1.04 [-2.32, 0.24]  |
| ≥ 60 years                              | 0              |                      | 2                | -0.20 [-0.74, 0.34]  |
| <i>P</i> -group difference <sup>b</sup> | -              |                      |                  | 0.23                 |
| <b>Sex</b>                              |                |                      |                  |                      |
| Female (< 50%)                          | 2              | -0.06 [-0.12, 0.01]  |                  | -0.04 [-0.29, 0.21]  |
| Female (≥ 50%)                          | 2              | -1.11 [-1.76, -0.46] |                  | -2.10 [-4.41, 0.21]  |
| <i>P</i> -group difference              |                | <0.01                |                  | 0.08                 |
| <b>Geographic region</b>                |                |                      |                  |                      |
| Americas                                | 1              | 0.00 [-0.28, 0.28]   | 2                | -0.04 [-0.29, 0.21]  |
| Asia                                    | 2              | -1.11 [-1.76, -0.46] | 0                |                      |
| Europe                                  | 1              | -0.06 [-0.13, 0.01]  | 2                | -2.10 [-4.41, 0.21]  |
| <i>P</i> -group difference              |                | <0.01                |                  | 0.08                 |
| <b>Health status</b>                    |                |                      |                  |                      |
| CVD                                     | 1              | -0.06 [-0.13, 0.01]  | 1                | -0.20 [-0.74, 0.34]  |
| Healthy                                 | 1              | 0.00 [-0.28, 0.28]   | 2                | -0.69 [-2.03, 0.65]  |
| Other                                   | 2              | -1.11 [-1.76, -0.46] | 1                | -4.00 [-7.43, -0.57] |
| <i>P</i> -group difference              |                | <0.01                |                  | 0.09                 |
| <b>Obesity</b>                          |                |                      |                  |                      |
| < 30 kg/m <sup>2</sup>                  | 3              | -0.09 [-0.32, 0.13]  | 2                | -0.69 [-2.03, 0.65]  |
| ≥ 30 kg/m <sup>2</sup>                  | 1              | -1.43 [-2.45, -0.41] | 2                | -1.71 [-5.35, 1.94]  |
| <i>P</i> -group difference              |                | 0.01                 |                  | 0.61                 |
| <b>Duration</b>                         |                |                      |                  |                      |
| < 6 months                              | 3              | -0.68 [-1.59, 0.23]  | 3                | -0.54 [-1.59, 0.52]  |
| ≥ 6 months                              | 1              | -0.06 [-0.13, 0.01]  | 1                | -4.00 [-7.43, -0.57] |
| <i>P</i> -group difference              |                | 0.18                 |                  | 0.06                 |
| < 1 year                                | 4              |                      | 4                |                      |
| ≥ 1 year                                | 0              |                      | 0                |                      |
| <i>P</i> -group difference              |                | -                    |                  | -                    |
| <b>Weight loss</b>                      |                |                      |                  |                      |
| In both groups                          | 0              |                      | 1                | -0.20 [-0.74, 0.34]  |
| Intervention                            | 3              | -0.69 [-1.57, 0.19]  | 2                | -4.00 [-7.43, -0.57] |
| Control                                 | 0              |                      | 0                |                      |
| None                                    | 1              | 0.00 [-0.28, 0.28]   | 2                | -0.69 [-2.03, 0.65]  |
| <i>P</i> -group difference              |                | 0.01                 |                  | 0.09                 |

<sup>a</sup>Number of studies in each subgroup; <sup>b</sup>*P*- significance of subgroup difference  
Abbreviations: CVD, cardiovascular disease; DASH, Dietary Adherence to Stop Hypertension; MetS, metabolic syndrome

**Supplemental Table 3.** Sensitivity analysis – Pooled estimates including shorter follow-up measurements of respective studies

|                  |                       | <b>Number<br/>studies with<br/>shorter follow-<br/>up</b> | <b>Mean difference<br/>[95% CI]</b> | <b><i>I</i><sup>2</sup></b> |
|------------------|-----------------------|-----------------------------------------------------------|-------------------------------------|-----------------------------|
| Mediterranean    | CRP (mg/L)            | 3                                                         | -0.91 [-1.99, 0.16]                 | 98%                         |
|                  | IL-6 (pg/mL)          | 3                                                         | -1.04 [-1.93, -0.15]                | 96%                         |
|                  | IL-8 (pg/mL)          | 3                                                         | -1.21 [-2.56, 0.14]                 | 85%                         |
|                  | TNF- $\alpha$ (pg/mL) | 1                                                         | -1.79 [-3.52, -0.07]                | 88%                         |
|                  | IL-1 $\beta$ (pg/mL)  | 1                                                         | -0.32 [-0.62, -0.02]                | 74%                         |
|                  | E-selectin (ng/mL)    | 1                                                         | -2.30 [-7.35, 2.76]                 | 93%                         |
|                  | IFN- $\gamma$ (pg/mL) | 1                                                         | -1.08 [-2.76, 0.59]                 | 97%                         |
| DASH             | CRP (mg/L)            | 0                                                         | NA                                  | NA                          |
| Vegetarian/vegan | CRP (mg/L)            | 1                                                         | -0.86 [-1.88, 0.15]                 | 96%                         |

Abbreviations: CRP, C-reactive protein

**Supplemental Table 4.** Estimates from multivariable meta-regression for Mediterranean diet and C-reactive protein

| <b>Variable</b> | <b><math>\beta</math>-coefficient (SE)</b> | <b><i>P</i>-value</b> |
|-----------------|--------------------------------------------|-----------------------|
| Study size      | -0.003 (0.001)                             | <.0001                |
| Sex             | 0.009 (0.013)                              | 0.494                 |
| Duration        | -0.012 (0.002)                             | <.0001                |
| BMI             | -0.135 (0.129)                             | 0.295                 |
| Age             | 0.006 (0.029)                              | 0.829                 |

**Supplemental Figure 1.** Funnel plots for Mediterranean diet interventions and C-reactive protein in (A) all studies included in the meta-analysis and (B) including the imputed studies from the trim-and-fill procedure

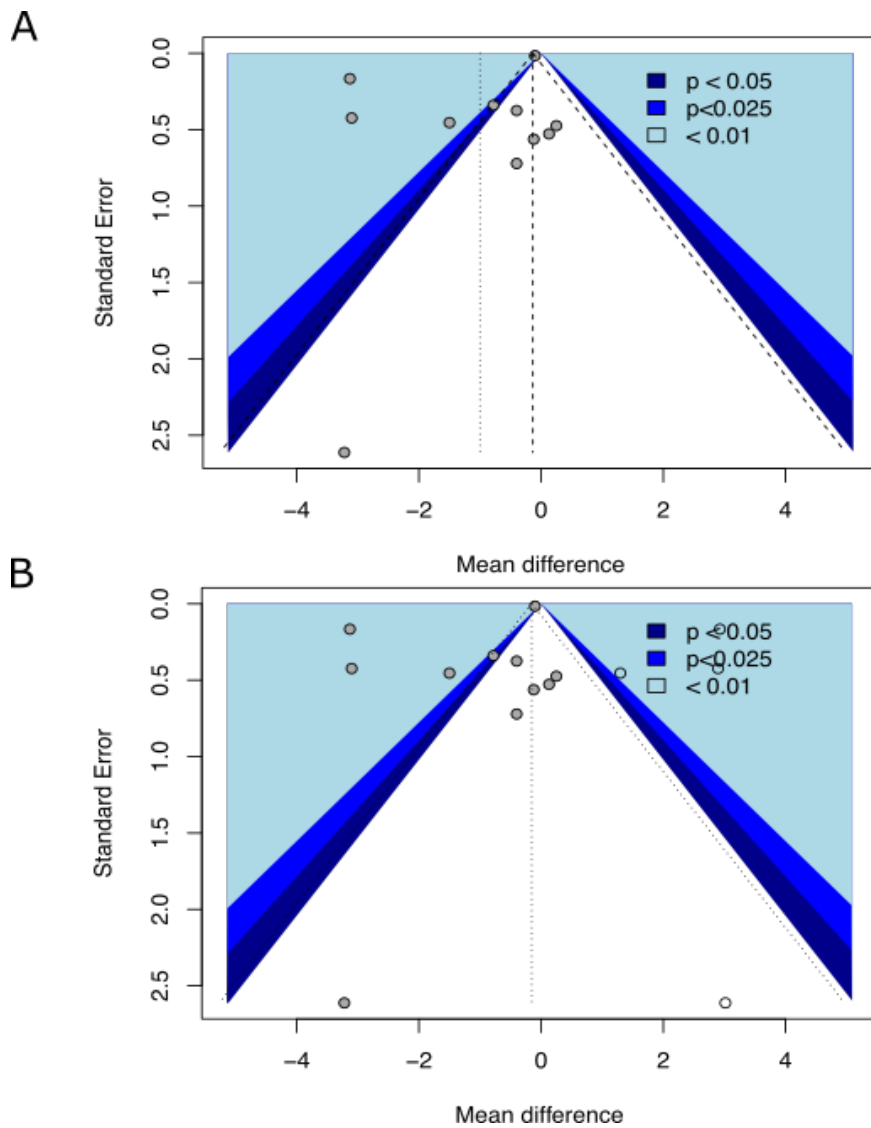

Supplement: nmab086_supplemental_file.pdf [file nmab086_supplemental_file.pdf]
